# Supplementary material for: Global Analysis of Serine/Threonine and Tyrosine Protein Phosphatase Catalytic Subunit Genes in Neurospora crassa Reveals Interplay Between Phosphatases and the p38 Mitogen-Activated Protein Kinase
Source: PubMed Central journal article supplement (PMC3931568; doi:10.1534/g3.113.008813), 2013-12-17
Supplement: supp_g3.113.008813_008813SI.pdf [file supp_g3.113.008813_008813SI.pdf]

**Global analysis of serine/threonine and tyrosine protein phosphatase catalytic subunit genes in *Neurospora crassa* reveals interplay between phosphatases and the p38 MAPK**

Arit Ghosh<sup>\*§†</sup>, Jacqueline A. Servin<sup>\*\*†</sup>, Gyungsoon Park<sup>\*\*†1</sup> and Katherine A. Borkovich<sup>\*§††</sup>

<sup>\*</sup>Department of Plant Pathology and Microbiology

<sup>§</sup>Graduate Program in Genetics, Genomics and Bioinformatics

<sup>†</sup>Institute for Integrative Genome Biology

University of California

Riverside, California 92521

<sup>1</sup>Current Address:

Plasma Bioscience Research Center

Kwangwoon University,

Seoul, Republic of Korea

<sup>‡</sup>Corresponding Author:

Email: [Katherine.Borkovich@ucr.edu](mailto:Katherine.Borkovich@ucr.edu)

Phone: (951) 827-2753

**DOI: 10.1534/g3.113.008813**

**Table S1 Detailed Growth and Developmental Phenotypes Data and Detailed Chemical Sensitivity and Nutritional Phenotype Data**

Available for download as an Excel file at <http://www.g3journal.org/lookup/suppl/doi:10.1534/g3.113.008813/-/DC1>

**Table S2 Primers used during this study**

| Gene       | FGSC Number    | Primer designation        | Primer sequence (5' to 3') |
|------------|----------------|---------------------------|----------------------------|
| NCU02496   | 16654          | Forward-diag <sup>1</sup> | GAACTTCCTAGGTTGCTGG        |
|            |                | Reverse-orf <sup>2</sup>  | GCAGCAGGTGAGTCTGGTAGTG     |
|            |                | Reverse-out <sup>3</sup>  | GCAGATTGCTCGCTCCATTG       |
|            |                | Reverse-diag <sup>4</sup> | ATGAAGTGCTGGTTGGAAGG       |
| NCU06252   | 14464          | Forward-diag              | GCTGTGGTGCGAGACTTTG        |
|            |                | Reverse-diag              | CACCATGATTCTCTCCGTCG       |
| <i>hph</i> | Not Applicable | Forward-HPH               | CGCCCCAGCACTCGTCCGAAG      |
|            |                | Reverse-HPH               | GGCATTATTGTTGACCTCCA       |

<sup>1</sup>Forward-diag = Sequence upstream of 5' flanking region of knockout cassette

<sup>2</sup>Reverse-orf = Sequence at 5' end of Open Reading Frame (ORF)

<sup>3</sup>Reverse-out = Sequence at upstream of the 5' end of ORF

<sup>4</sup>Reverse-diag = Sequence downstream of 3' flanking region of knockout cassette
