# Supplementary material for: Global Analysis of Serine/Threonine and Tyrosine Protein Phosphatase Catalytic Subunit Genes in Neurospora crassa Reveals Interplay Between Phosphatases and the p38 Mitogen-Activated Protein Kinase
Source: PubMed Central journal article supplement (PMC3931568; doi:10.1534/g3.113.008813), 2013-12-17
Supplement: supp_g3.113.008813_TableS2.pdf [file supp_g3.113.008813_TableS2.pdf]

**Table S2 Primers used during this study**

| Gene       | FGSC Number    | Primer designation        | Primer sequence (5' to 3') |
|------------|----------------|---------------------------|----------------------------|
| NCU02496   | 16654          | Forward-diag <sup>1</sup> | GAACTTCCTAGGTTGCTGG        |
|            |                | Reverse-orf <sup>2</sup>  | GCAGCAGGTGAGTCTGGTAGTG     |
|            |                | Reverse-out <sup>3</sup>  | GCAGATTGCTCGCTCCATTG       |
|            |                | Reverse-diag <sup>4</sup> | ATGAAGTGCTGGTTGGAAGG       |
| NCU06252   | 14464          | Forward-diag              | GCTGTGGTGCGAGACTTTG        |
|            |                | Reverse-diag              | CACCATGATTCTCTCCGTCG       |
| <i>hph</i> | Not Applicable | Forward-HPH               | CGCCCCAGCACTCGTCCGAAG      |
|            |                | Reverse-HPH               | GGCATTATTGTTGACCTCCA       |

<sup>1</sup>Forward-diag = Sequence upstream of 5' flanking region of knockout cassette

<sup>2</sup>Reverse-orf = Sequence at 5' end of Open Reading Frame (ORF)

<sup>3</sup>Reverse-out = Sequence at upstream of the 5' end of ORF

<sup>4</sup>Reverse-diag = Sequence downstream of 3' flanking region of knockout cassette
